# Supplementary material
Source: MDPI journal article supplement (https://www.mdpi.com/2071-1050/11/17/4809)
Supplement: s1 [file s1]

## **SURVEY OF ENERGY CONSUMPTION IN NZ DAIRY FARMING SYSTEMS**

**Questionnaire Number.....**

**Data Required: Season 2016-17**

**Date: .../.../ ...**

Dear Farmer

The information you give us is kept “**strictly confidential**” and will not be given any organization, agency, department or person and it has purely academic research. By completing the survey, you will be acknowledging that you understand what is involved in your participation and are providing your consent to participate in the study. Thanks

### **1- Information about Farm System**

|                                                                                                                                            |                                                                      |                                                                         |                                                                                        |                                                                                        |
|--------------------------------------------------------------------------------------------------------------------------------------------|----------------------------------------------------------------------|-------------------------------------------------------------------------|----------------------------------------------------------------------------------------|----------------------------------------------------------------------------------------|
| The following indicates the <b>DairyNZ classification of 5 Production Systems</b> , please tick one option that best applies to your farm: |                                                                      |                                                                         |                                                                                        |                                                                                        |
| All grass self-contained<br><b>(System 1)</b>                                                                                              | Feed imported, either supplement or grazing off<br><b>(System 2)</b> | Feed imported to extend lactation and for dry cows<br><b>(System 3)</b> | Feed imported and used at both ends of lactation and for dry cows<br><b>(System 4)</b> | Imported feed used all year throughout lactation and for dry cows<br><b>(System 5)</b> |
|                                                                                                                                            |                                                                      |                                                                         |                                                                                        |                                                                                        |

|                                                                                                        |                                    |                 |
|--------------------------------------------------------------------------------------------------------|------------------------------------|-----------------|
| If your farm has an <b>Off-Paddock Shed/Barn Facility</b> , Please tick one option from the following: |                                    |                 |
| Loose housed barn-soft bedding material                                                                | Loose housed barn-slatted concrete | Free-stall barn |
|                                                                                                        |                                    |                 |

|                                                                                               |                                                                                     |
|-----------------------------------------------------------------------------------------------|-------------------------------------------------------------------------------------|
| If you farm has an <b>Off-Paddock Shed/Barn Facility</b> , Please also specify the following: |                                                                                     |
| How many weeks feed or kept cows inside shed <b>(average no. of weeks per year)</b>           | How many weeks feed cows in pasture paddocks <b>(average no. of weeks per year)</b> |
|                                                                                               |                                                                                     |

### **2- Information about Farm Land and Buildings**

|                                                                                                                          |  |
|--------------------------------------------------------------------------------------------------------------------------|--|
| Total farm land <b>(ha)</b><br>(i.e. Total dairying area including milking platform, animal runoff, infrastructure etc.) |  |
| Area for milking platform <b>(Effective ha)</b>                                                                          |  |
| Area for animal runoff/support block, if any <b>(Effective ha)</b>                                                       |  |

|                                             |  |
|---------------------------------------------|--|
| Area for milking shed (Effective ha)        |  |
| Area for crops grown, if any (Effective ha) |  |

### 3- Information about Livestock

| Type                                                                          | Type of livestock breeding |                |                 | Average age (year) | Average weight (kg) |
|-------------------------------------------------------------------------------|----------------------------|----------------|-----------------|--------------------|---------------------|
|                                                                               | Jersey (No.)               | Friesian (No.) | Crossbred (No.) |                    |                     |
| Milking cows on 1st June including heifers & dry cows (i.e. Peak cows milked) |                            |                |                 |                    |                     |
| Rising one year old animals (R1)                                              |                            |                |                 |                    |                     |
| Rising two year old animals (R2)                                              |                            |                |                 |                    |                     |

### 4-Information about Milk Output for Season 2016-2017

| Total Milk Production (kgMS) |           | Milk Ingredients |              |                    |
|------------------------------|-----------|------------------|--------------|--------------------|
| Kg MS/ha                     | Kg MS/cow | % of Fat         | % of Protein | % of Carbohydrates |
|                              |           |                  |              |                    |

### 5- Information about Machinery, Equipment's & Vehicles

| Name            | Brand & Model | Age (years) | Power |    | Time use (average) |           |
|-----------------|---------------|-------------|-------|----|--------------------|-----------|
|                 |               |             | HP    | kW | hours/day          | days/year |
| Tractor         |               |             |       |    |                    |           |
| Tractor         |               |             |       |    |                    |           |
| Tractor         |               |             |       |    |                    |           |
| Quad Bike       |               |             |       |    |                    |           |
| Quad Bike       |               |             |       |    |                    |           |
| 2 wheeler Bikes |               |             |       |    |                    |           |
| Ute             |               |             |       |    |                    |           |
| Ute             |               |             |       |    |                    |           |

|        |  |  |  |  |  |  |
|--------|--|--|--|--|--|--|
| Others |  |  |  |  |  |  |
|--------|--|--|--|--|--|--|

#### 6- Information about Milking Parlours

| Type                                                                   | Name of equipment | Brand & model | Sets of cups | Time use (milking+ washing) |           | Milking/day (No.) |
|------------------------------------------------------------------------|-------------------|---------------|--------------|-----------------------------|-----------|-------------------|
|                                                                        |                   |               |              | hours/day                   | days/year |                   |
| Type of Milking system<br>(i.e. Herringbone, Rotary platform, Robotic) |                   |               |              |                             |           |                   |

#### 7- Information about Direct Energy Inputs

|                                                                                        |  |
|----------------------------------------------------------------------------------------|--|
| Total diesel used per year (litre)                                                     |  |
| Total petrol used per year (litre)                                                     |  |
| Total electricity used per year (Kwh)                                                  |  |
| Electricity for irrigation                                                             |  |
| Electricity for other farm operations (i.e. milking shed, houses, Barn buildings etc.) |  |
| <b>Labour (Full-time equivalent)</b>                                                   |  |
| Number of employees:                                                                   |  |
| Average working hours per day:                                                         |  |
| Average working days per year:                                                         |  |

#### 8- Information about Fertilizer Usage

|                                                       |        | Name of Fertiliser Product | Quantity consumed (kg or litre) |
|-------------------------------------------------------|--------|----------------------------|---------------------------------|
| Fertilizers (Kg)<br>(urea, phosphate, potassium etc.) | N      |                            |                                 |
|                                                       | P      |                            |                                 |
|                                                       | K      |                            |                                 |
|                                                       | S      |                            |                                 |
|                                                       | Others |                            |                                 |

**9- Information about Feed Consumption**

| <b>Feed consumption</b> | <b>Name (i.e. ryegrass, clover, cocksfoot, tall fescue, other)</b> | <b>Feed Produced on farm (kg DM/Year)</b> | <b>Feed Purchased outside (Kg DM/Year)</b> | <b>Feed consumed per cow (Kg DM/Year)</b> |
|-------------------------|--------------------------------------------------------------------|-------------------------------------------|--------------------------------------------|-------------------------------------------|
| <i>Pasture type 1</i>   |                                                                    |                                           |                                            |                                           |
| <i>Pasture type 2</i>   |                                                                    |                                           |                                            |                                           |
| <i>Crop 1</i>           |                                                                    |                                           |                                            |                                           |
| <i>Crop 2</i>           |                                                                    |                                           |                                            |                                           |
| <i>Supplement 1</i>     |                                                                    |                                           |                                            |                                           |
| <i>Supplement 2</i>     |                                                                    |                                           |                                            |                                           |
| <i>Supplement 3</i>     |                                                                    |                                           |                                            |                                           |
| <i>Supplement 4</i>     |                                                                    |                                           |                                            |                                           |
| <i>Supplement 5</i>     |                                                                    |                                           |                                            |                                           |

**Thank you for your time and cooperation.**
